# Supplementary material for: Can Hamilton’s rule be violated?
Source: eLife journal article supplement (doi:10.7554/elife.41901), 2018-10-15
Supplement: supp [file elife-41901-supp-v1.zip]

Archive with 1 entries (1 files):
- elife_poa_e41901_Transparent_Reporting_File.pdf
